# Supplementary material for: Fagopyrum tataricum ethanol extract ameliorates symptoms of hyperglycemia by regulating gut microbiota in type 2 diabetes mellitus mice
Source: Royal Society of Chemistry journal article supplement (doi:10.1039/d3fo02385k), 2023-01-01
Supplement: d3fo02385k1.xlsx [file d3fo02385k1.xlsx]

## Sheet: 生化指标
血清GSP	Normal	Model	FTE-L	FTE-H	MET
	2.84571	4.15741	2.80547	2.9902	3.24151
	2.53546	4.69857	3.41547	3.07574	2.89763
	3.01476	4.35525	3.34579	3.37125	3.53546
	2.93778	4.58522	3.01546	2.94982	3.37175
	3.06246	4.02685	2.75852	2.6893	3.25947
	3.13579	4.89548	3.27813	3.22062	3.02543
血清TC	Normal	Model	FTE-L	FTE-H	MET
	3.15725	8.18748	4.95584	4.48078	4.77854
	3.0874	10.0653	4.44896	4.26625	4.56985
	3.39872	9.15844	4.82932	3.85874	5.78951
	3.65419	7.98522	4.63442	5.01183	3.88601
	3.50189	9.35745	4.11025	3.75899	5.5121
	3.27273	8.83927	5.10889	4.16213	5.98531
血清TG	Normal	Model	FTE-L	FTE-H	MET
	1.12041	3.35843	2.56814	2.01881	2.18117
	1.35665	3.15482	2.16586	1.29869	2.42191
	1.25888	2.97582	1.83388	1.56409	2.24716
	1.46588	3.45751	1.72815	1.8582	2.20365
	0.998633	3.68546	2.43329	1.45643	2.25474
	1.25614	2.96324	1.59793	1.60778	1.6845
血清LDL-C	Normal	Model	FTE-L	FTE-H	MET
	0.284623	1.8797	0.284345	0.192461	0.354784
	0.2679	1.15425	0.228616	0.259522	0.374588
	0.316544	1.7426	0.264494	0.22663	0.321566
	0.356987	1.35499	0.293691	0.172485	0.298748
	0.269659	1.59879	0.199396	0.203541	0.302589
	0.210241	1.63699	0.179672	0.243391	0.278753
血清HDL-C	Normal	Model	FTE-L	FTE-H	MET
	3.24511	2.45782	3.42821	3.24509	3.05487
	3.69855	2.65426	2.52897	3.3602	2.86598
	3.45241	2.87965	3.75617	3.60756	3.26549
	3.12457	2.34584	3.37506	3.55693	3.45547
	3.58967	2.75842	3.58791	3.75227	3.78522
	3.80586	2.15875	2.5937	2.69773	2.93126
血清LDL/HDL	Normal	Model	FTE-L	FTE-H	MET
	0.0877085	0.764784	0.0829426	0.0593085	0.116137
	0.0724338	0.434866	0.0903988	0.077234	0.130702
	0.0916877	0.605141	0.0704159	0.0628209	0.098474
	0.114252	0.577613	0.0870178	0.0484927	0.0864566
	0.0751208	0.579604	0.0555744	0.0542448	0.0799395
	0.0552413	0.758305	0.0692723	0.0902206	0.0950967
肝脏LDL/HDL	Normal	Model	FTE-L	FTE-H	MET
	0.263017	4.36365	0.43063	0.481997	1.08993
	0.93745	2.9953	1.62126	1.28938	1.38627
	0.136755	5.70137	1.7558	0.982309	0.871754
	0.727023	2.84337	0.916542	0.516836	0.781085
	1.2964	5.93972	2.22598	0.75712	0.975179
	0.551505	3.98795	0.522538	1.18769	2.0422
肝脏组织评分	Normal	Model	FTE-L	FTE-H	MET
	0.9	6.5	2.2	1.4	2.5
	0.8	5.8	1.8	1	2
	1.4	5.2	1.5	1.2	1.4
	1.2	6.1	1.3	1.5	2.8
	1	5.5	1.6	1.6	1.6
	1.1	5.7	1.9	1.8	1.9
盲肠组织评分	Normal	Model	FTE-L	FTE-H	MET
	2.3	6.1	2.8	2.2	3.4
	1.5	5.4	3	2	2.9
	1.7	5.9	2.6	1.6	3.2
	2	5.7	2.1	2.5	2.3
	1.3	5.2	3.2	2.9	2.5
	1.6	4.5	2.5	3	3.1
摄食量0WK	Normal	Model	FTE-L	FTE-H	MET
	6.17	7.15	7.06	6.84	6.82
	6.58	7.28	7.34	6.97	7.25
	6.44	7.44	6.95	7.25	7.43
	6.62	7.03	7.28	7.34	6.74
	6.31	7.36	7.11	7.08	7.08
	6.52	7.24	7.16	7.13	7.34
摄食量2WK	Normal	Model	FTE-L	FTE-H	MET
	6.84	7.25	7.28	7.65	7.51
	6.55	7.18	7.61	6.87	7.29
	6.97	7.39	7.44	7.24	6.96
	6.78	7.46	7.07	7.03	7.08
	6.63	7.31	7.15	7.26	7.17
	6.74	7.53	7.39	7.34	7.36
摄食量4WK	Normal	Model	FTE-L	FTE-H	MET
	6.68	7.35	7.05	6.84	7.26
	6.79	7.27	6.88	6.55	7.03
	6.88	7.48	6.93	6.97	6.85
	6.43	7.52	7.25	7.46	6.97
	6.54	7.76	7.18	7.06	7.18
	6.73	7.67	7.32	7.21	7.23
肝脏TC	Normal	Model	FTE-L	FTE-H	MET
	0.0685429	0.198754	0.0962565	0.0682456	0.054214
	0.0754953	0.162567	0.0864579	0.0722457	0.0321409
	0.0532461	0.228542	0.0777579	0.0857899	0.0451268
	0.0659834	0.243213	0.0927896	0.0544568	0.0658718
	0.0498565	0.205773	0.0724578	0.0834579	0.0524173
	0.0521461	0.216574	0.0654579	0.0764558	0.0628406
肝脏TG	Normal	Model	FTE-L	FTE-H	MET
	0.138572	0.352476	0.182355	0.177333	0.16587
	0.124866	0.286946	0.194565	0.167655	0.165483
	0.112021	0.296341	0.21579	0.136645	0.184215
	0.125853	0.332561	0.179865	0.154315	0.17964
	0.145981	0.315894	0.236468	0.121622	0.215045
	0.163581	0.365871	0.201646	0.156117	0.156943
肝脏LDL-C	Normal	Model	FTE-L	FTE-H	MET
	0.00845714	0.0325472	0.0134535	0.00850824	0.0120149
	0.00415874	0.0268541	0.0187185	0.0102976	0.0175841
	0.0035129	0.0298548	0.0158118	0.0142627	0.0136854
	0.00658477	0.0185742	0.0121402	0.0102918	0.0102599
	0.0052417	0.039157	0.0213355	0.0116079	0.0196571
	0.00745815	0.0345122	0.00848382	0.0083961	0.0156985
肝脏HDL-C	Normal	Model	FTE-L	FTE-H	MET
	0.0321543	0.0074587	0.0312415	0.0176521	0.0110236
	0.0302564	0.00896541	0.0115457	0.0355851	0.0126845
	0.0256876	0.00523642	0.00900549	0.0295717	0.0156987
	0.0201355	0.00653243	0.0132456	0.0199132	0.0131355
	0.0176845	0.0065924	0.00958478	0.0253935	0.0201574
	0.029654	0.00865414	0.0162358	0.0216569	0.00768705
体重0周	Normal	Model	FTE-L	FTE-H	MET
	53.64	38.45	40.72	38.83	41.36
	52.17	41.29	39.83	43.65	42.59
	49.25	40.64	43.59	40.83	38.26
	50.31	42.87	41.47	43.41	39.17
	46.84	42.21	40.35	37.95	40.42
	48.67	39.61	37.12	39.97	39.67
体重2周	Normal	Model	FTE-L	FTE-H	MET
	53.02	34.67	40.78	44.27	39.15
	51.36	42.34	41.34	43.21	40.46
	52.67	36.94	41.51	44.34	42.37
	50.28	40.06	42.37	42.53	36.78
	53.26	41.59	41.72	43.23	38.95
	51.87	39.65	43.29	40.85	42.56
体重4周	Normal	Model	FTE-L	FTE-H	MET
	59.64	40.35	39.59	44.9	36.74
	57.62	38.64	47.88	45.55	33.27
	62.36	34.75	41.38	46.5	38.13
	54.55	39.56	42.42	48.8	37.95
	58.85	36.76	42.14	44.81	35.66
	57.32	37.59	42.38	45.41	36.79
血糖0周	Normal	Model	FTE-L	FTE-H	MET
	6.8	11.8	9.7	10.1	11.3
	6.4	12.1	10.4	10.9	12.8
	6.1	11.9	11.1	11.6	10.4
	6.5	10.4	13.8	11.3	10.9
	6.9	12.5	12.3	14.1	9.5
	6.2	10.1	11.9	10.3	13.7
血糖2周	Normal	Model	FTE-L	FTE-H	MET
	7.5	24.7	13.6	11.3	13.4
	6.3	24.4	11.7	12.1	9.8
	6.2	25.8	13.7	12.2	8.5
	7	28.3	12.5	11.2	9.2
	6.2	26.5	12.1	10.4	8.6
	6.4	27.7	10.9	11.2	14
血糖4周	Normal	Model	FTE-L	FTE-H	MET
	7.2	27.4	25.8	23.8	25.4
	6.8	26.5	18.6	16.9	22.7
	7.5	28.1	25.4	22.2	20.5
	7.4	33	19.9	13.9	18.9
	8	31.2	23.2	17.4	19.7
	6.5	33	23.8	21.1	17.4
OGTT0h	Normal	Model	FTE-L	FTE-H	MET
	7.2	27.4	26.1	23.8	25.4
	6.8	26.5	18.7	16.9	22.7
	7.5	28.1	25.2	22.2	20.5
	7.4	33	19.8	13.9	18.9
	8	31.2	22.9	17.4	19.7
	6.5	33	25.1	21.1	17.4
OGTT0.5h	Normal	Model	FTE-L	FTE-H	MET
	15.1	32.9	29.8	31.8	28.4
	14.7	33	29.5	17	24.3
	16.8	32.8	22.6	23.3	31.7
	13.4	32.5	32.3	31.4	30.6
	17.1	32.1	27.5	27.7	27.7
	16.3	32.4	30.6	28.5	25.6
OGTT1h	Normal	Model	FTE-L	FTE-H	MET
	10.9	33	24.2	15.7	26.8
	12.4	32.5	29.3	22.1	28.2
	9.8	33	19.6	28.1	31.5
	12.1	28.7	25.8	29.3	24.9
	10.2	30.6	29.5	24.3	21.7
	10.7	31.1	28.7	25.9	25.5
OGTT2h	Normal	Model	FTE-L	FTE-H	MET
	6.1	32.1	26.8	19.3	20.5
	5.4	29.5	25.7	12.3	23.8
	5.9	26.4	24.2	23.6	20.7
	5.7	31.1	15.9	17.9	22.6
	6.5	30.8	24.1	22.8	18.4
	5	29.2	18.8	19.3	17.6
AUC	Normal	Model	FTE-L	FTE-H	MET
	21.475	63.925	56.425	52.225	50.125
	20.45	61.75	53.45	40.45	47.825
	23.1	59.825	47.05	46.55	52.35
	19.525	64.575	49.175	48.3	52.275
	23.975	63.9	51.3	49.15	46.425
	21.675	63.15	50.975	48.25	43.15
HOMA-ISI	Normal	Model	FTE-L	FTE-H	MET
	0.00898744	0.00214571	0.00332636	0.00332894	0.00312025
	0.00874164	0.00158739	0.00264544	0.00433128	0.00421566
	0.0114752	0.00198658	0.00261243	0.00347223	0.00296588
	0.00765844	0.00235211	0.00267855	0.00643003	0.00215545
	0.00964856	0.00175745	0.00415865	0.00515471	0.00332016
	0.0102471	0.00205141	0.00258486	0.00321823	0.00302654
HOMA-IRI	Normal	Model	FTE-L	FTE-H	MET
	4.50215	21.4327	13.8479	16.7644	9.75456
	4.80326	23.732	17.6613	11.0297	11.259
	3.64251	23.6625	16.5938	15.1796	14.5644
	5.32024	21.5103	15.761	10.8062	13.9658
	3.99954	22.7967	10.8174	13.7927	9.95564
	5.34106	22.0125	12.9647	14.394	15.0258
HOMA-β	Normal	Model	FTE-L	FTE-H	MET
	67.3255	9.85154	17.6846	16.5261	20.2357
	62.1556	10.4562	16.1675	26.5711	21.3658
	66.257	11.1255	21.5312	18.5811	18.3246
	62.1454	8.12456	19.8326	27.64	16.3259
	65.4565	13.6586	15.5036	24.2084	24.357
	70.7855	10.4522	19.1986	19.1406	13.5665
IL-6	Normal	Model	FTE-L	FTE-H	MET
	78.6361	95.5544	69.1578	67.3107	77.3665
	72.3665	91.3206	75.7426	77.1717	82.3121
	70.2665	93.3202	74.3526	75.0581	79.3658
	71.3326	85.1257	73.1726	72.9678	80.3321
	69.3255	83.257	78.5659	65.945	75.4125
	75.3215	87.8548	76.2146	70.4029	70.3547
IL-10	Normal	Model	FTE-L	FTE-H	MET
	321.237	204.322	237.575	251.914	260.369
	303.365	197.567	228.124	257.174	253.593
	300.27	203.27	260.395	308.134	265.457
	309.369	206.321	239.246	272.29	244.253
	317.665	200.267	251.135	263.374	248.458
	302.326	195.367	246.335	251.231	253.742
肠道-乙酸	Normal	Model	FTE-L	FTE-H	MET
	30.2574	14.2566	30.6981	35.5307	27.3351
	27.1595	16.3254	27.4414	33.1473	29.3512
	29.1457	10.2359	31.7788	34.4773	22.6551
	31.2565	12.3212	32.9977	32.7071	26.6554
	31.2565	13.6543	28.3948	31.9995	28.6454
	29.5648	15.2365	25.0031	35.2379	31.2365
肠道-丙酸	Normal	Model	FTE-L	FTE-H	MET
	16.3541	11.3256	20.1052	22.1321	21.6644
	19.3231	9.85645	21.3408	22.6087	18.6544
	17.6454	10.3256	19.0112	21.2457	19.6365
	18.2586	12.6654	21.1235	20.5176	20.3211
	20.3645	8.23641	22.3923	23.5923	21.3251
	16.3258	10.3326	20.6102	24.8845	17.6651
肠道-异丁酸	Normal	Model	FTE-L	FTE-H	MET
	5.82146	4.65441	5.21254	5.53125	5.06365
	5.77116	4.21213	5.12145	5.49595	4.84561
	6.06358	4.43357	5.12285	5.69912	5.12321
	5.75412	4.03216	5.15793	5.88724	4.76455
	5.45994	4.52316	5.18947	5.96493	4.96658
	5.96789	4.36542	5.21626	5.76451	5.03255
肠道-丁酸	Normal	Model	FTE-L	FTE-H	MET
	14.3356	8.03212	11.9695	15.0219	18.2567
	13.1455	8.21324	13.2491	16.4297	16.3666
	13.5224	8.56475	12.2457	14.69	19.6654
	14.0527	8.96545	13.2585	16.9433	17.3656
	13.9889	9.21445	15.8419	15.389	18.3246
	14.8521	9.05263	11.0231	17.1209	19.3257
肠道-异戊酸	Normal	Model	FTE-L	FTE-H	MET
	1.32153	0.795454	1.25733	1.76359	1.85665
	1.36562	0.785645	1.23679	1.95808	1.53665
	1.26452	0.804156	1.17078	1.69823	1.84563
	1.32156	0.841265	1.14615	1.86853	1.99667
	1.23455	0.881422	1.37279	1.95952	1.74566
	1.20236	0.851234	1.59564	1.8373	1.65424
肠道-戊酸	Normal	Model	FTE-L	FTE-H	MET
	2.52354	1.08964	2.12518	2.6721	2.34646
	2.62364	1.11236	1.87065	2.22132	2.65454
	2.71563	1.13257	1.82823	2.43654	2.36655
	2.39566	1.23567	1.97789	2.38831	2.54451
	2.46554	1.43365	1.96163	2.87278	2.45666
	2.73321	1.23001	2.17808	2.5587	2.74562
肠道-SCFA	Normal	Model	FTE-L	FTE-H	MET
	70.6137	40.1539	71.368	82.6517	76.523
	69.3886	40.5052	70.2602	81.8611	73.4091
	70.3572	35.4966	71.1576	80.247	71.2925
	73.0391	40.0612	75.6617	80.3121	73.6479
	74.77	37.9434	75.1528	81.7781	77.464
	70.6462	41.0684	65.6264	87.4038	77.6596

## Sheet: r1值
	Bodyweight	FBG	AUC.of.OGTT	Serum.GSP	HOMA.IRI	HOMA.beta	HOMA.ISI	Serum.TC	Serum.TG	Serum.LDL.c	Serum.HDL.c	IL.6	IL.10	Liver.TC	Liver.TG	Liver.LDL.c	Liver.HDL.c
Lactobacillus	0.670677	-0.697744	-0.654135	-0.664662	-0.601504	0.633083	0.687218	-0.643609	-0.64812	-0.700752	0.484211	-0.678195	0.690226	-0.684211	0.043609	-0.723308	0.778947
unidentified_Enterobacteriaceae	0.0105263	0.111278	0.142857	-0.132331	0.0330827	-0.195489	0.0180451	-0.0541353	0.0857143	-0.401504	-0.0345865	-0.294737	-0.0571429	-0.0300752	-0.203008	0.0466165	0.221053
Alloprevotella	0.0887218	-0.00451128	-0.0406015	0.261654	-0.0917293	-0.0315789	0.0616541	-0.0977444	-0.0315789	0.16391	-0.293233	0.249624	-0.0225564	-0.0195489	0.348872	0.0406015	-0.0195489
Alistipes	0.233083	-0.221053	-0.177444	-0.439098	-0.209023	0.225564	0.257143	-0.356391	-0.309774	-0.557895	0.207519	-0.449624	0.2	-0.245113	-0.106767	-0.257143	0.433083
Bacteroides	0.308271	-0.245113	-0.421053	-0.434586	-0.407519	0.381955	0.38797	-0.463158	-0.344361	-0.198496	0.302256	-0.469173	0.553383	-0.347368	-0.321805	-0.440602	0.392481
Desulfovibrio	-0.676692	0.654135	0.667669	0.347368	0.467669	-0.598496	-0.554887	0.568421	0.569925	0.395489	-0.18797	0.422556	-0.633083	0.572932	-0.23609	0.658647	-0.610526
Lachnoclostridium	-0.61203	0.511278	0.560902	0.398496	0.461654	-0.538346	-0.509774	0.452632	0.467669	0.569925	-0.315789	0.639098	-0.603008	0.633083	0.114286	0.586466	-0.562406
Parabacteroides	-0.0684468	0.135389	0.227153	0.432493	0.183528	-0.234675	-0.212862	0.10079	0.217375	0.649116	-0.464084	0.36179	-0.237683	0.277548	0.0639338	0.179015	-0.458819
unidentified_Ruminococcaceae	-0.15188	0.120301	0.0646617	-0.148872	-0.0075188	0.00601504	-0.00902256	0.169925	0.037594	-0.318797	0.350376	-0.24812	-0.0451128	0.0300752	-0.172932	0.0390977	0.169925
Ruminiclostridium	-0.340362	0.400603	0.289157	0.0753013	0.135542	-0.22741	-0.254518	0.305723	0.317771	0.0753013	0.0421687	0.159639	-0.260542	0.277109	-0.295181	0.317771	-0.167169
unidentified_Lachnospiraceae	-0.389474	0.330827	0.333835	0.258647	0.305263	-0.300752	-0.393985	0.446617	0.446617	0.553383	-0.401504	0.610526	-0.323308	0.440602	-0.264662	0.389474	-0.383459
Oscillibacter	-0.685972	0.680707	0.704776	0.444528	0.539301	-0.668672	-0.661151	0.637834	0.716811	0.529522	-0.345243	0.510718	-0.720572	0.640842	-0.112072	0.740128	-0.739376
Erysipelatoclostridium	-0.103759	0.118797	0.112782	0.526316	0.255639	-0.17594	-0.252632	0.16391	0.169925	0.822556	-0.541353	0.425564	-0.221053	0.282707	0.0796992	0.166917	-0.386466
Roseburia	-0.445113	0.407519	0.396992	0.479699	0.422556	-0.390977	-0.476692	0.485714	0.487218	0.852632	-0.506767	0.580451	-0.499248	0.622556	-0.0541353	0.390977	-0.360902
Dubosiella	-0.120092	0.0219035	0.0936566	0.127645	0.0657106	-0.0430518	-0.0951671	0.033233	0.0521153	0.593662	-0.250003	0.124624	-0.182026	0.202419	-0.0438071	0.0800612	-0.28248
Helicobacter	0.0796992	-0.102256	-0.180451	-0.0571429	-0.162406	0.210526	0.123308	-0.171429	-0.102256	0.425564	0.118797	-0.147368	0.100752	0.147368	0.0180451	-0.171429	0.0421053
Enterorhabdus	0.356391	-0.401504	-0.416541	-0.521805	-0.431579	0.491729	0.449624	-0.398496	-0.497744	-0.455639	0.422556	-0.377444	0.427068	-0.404511	-0.228571	-0.41203	0.652632
Candidatus_Saccharimonas	0.228657	-0.298609	-0.353516	-0.452802	-0.276044	0.352764	0.343738	-0.23317	-0.318165	-0.503197	0.324934	-0.265513	0.416698	-0.364799	-0.216623	-0.318165	0.376833
Blautia	-0.168675	0.0963857	0.129518	-0.0948796	-0.0527109	-0.141566	-0.00753013	0.0271085	0.164157	0.414157	-0.277109	0.346386	-0.207832	0.167169	-0.0195783	0.0753013	0.00150603
Akkermansia	-0.219209	0.236535	0.241808	0.299059	0.225236	-0.320151	-0.266667	0.224483	0.378908	0.656875	-0.570999	0.586065	-0.279473	0.240302	-0.0564973	0.241808	-0.500189
Mucispirillum	-0.531779	0.503949	0.455058	0.168484	0.265513	-0.413689	-0.391125	0.439263	0.491914	0.358029	-0.0142911	0.421211	-0.508462	0.453554	-0.036856	0.520496	-0.449793
Intestinimonas	-0.545865	0.476692	0.383459	0.190977	0.418045	-0.419549	-0.523308	0.41203	0.36391	-0.100752	0.0992481	0.258647	-0.44812	0.487218	0.0842105	0.580451	-0.148872
Parasutterella	-0.0541557	0.154193	0.129372	0.400903	0.0699511	-0.0857465	-0.0729598	0.110568	0.0872509	0.722076	-0.378338	0.41745	-0.060173	0.179767	-0.28507	0.0526514	-0.271531
Bilophila	-0.383892	0.297328	0.299586	0.47723	0.380128	-0.371848	-0.435077	0.407979	0.432819	0.775311	-0.599172	0.801657	-0.447121	0.483252	0.133233	0.438088	-0.488521
Muribaculum	-0.196992	0.221053	0.23609	0.206015	0.231579	-0.285714	-0.27218	0.0977444	0.216541	0.0721805	0.0210526	0.33985	-0.174436	0.278195	0.0526316	0.467669	-0.35188
Butyricicoccus	-0.027088	0.0398796	0.00902935	-0.442438	-0.263356	0.10158	0.179082	-0.137698	0.0285929	-0.0534236	0.282167	-0.13544	0.0970655	0.0338601	-0.414598	-0.0218209	0.17833
unidentified_Clostridiales	-0.494349	0.423513	0.412209	0.110776	0.245668	-0.256218	-0.317258	0.382066	0.35343	0.465713	-0.153731	0.295404	-0.279579	0.492842	-0.451395	0.397137	-0.33459

## Sheet: r2值
	Acetic.acid	Propionic.acid	Isobutyric.acid	Butyric.acid	Isovaleric.acid	Valeric.acid	SCFAs
Lactobacillus	0.693233	0.64812	0.783459	0.714286	0.861654	0.790977	0.721805
unidentified_Enterobacteriaceae	0.425564	0.613534	0.145865	0.35188	0.43609	0.177444	0.490226
Alloprevotella	-0.251128	-0.0330827	-0.227068	-0.0180451	-0.136842	-0.213534	-0.21203
Alistipes	0.598496	0.723308	0.366917	0.581955	0.586466	0.476692	0.640602
Bacteroides	0.418045	0.169925	0.312782	0.269173	0.267669	0.430075	0.335338
Desulfovibrio	-0.428571	-0.302256	-0.57594	-0.437594	-0.581955	-0.568421	-0.33985
Lachnoclostridium	-0.73985	-0.467669	-0.630075	-0.596992	-0.610526	-0.596992	-0.622556
Parabacteroides	-0.688229	-0.602482	-0.487401	-0.67469	-0.739376	-0.38962	-0.708537
unidentified_Ruminococcaceae	0.481203	0.37594	0.270677	0.380451	0.4	0.144361	0.479699
Ruminiclostridium	0.00451808	-0.057229	-0.209338	-0.0813254	-0.183735	-0.293675	-0.0466868
unidentified_Lachnospiraceae	-0.46015	-0.667669	-0.366917	-0.439098	-0.524812	-0.535338	-0.505263
Oscillibacter	-0.635577	-0.470854	-0.710041	-0.656638	-0.735615	-0.763445	-0.588943
Erysipelatoclostridium	-0.580451	-0.726316	-0.378947	-0.66015	-0.661654	-0.360902	-0.690226
Roseburia	-0.679699	-0.843609	-0.428571	-0.783459	-0.696241	-0.545865	-0.784962
Dubosiella	-0.40937	-0.420699	-0.197887	-0.370094	-0.454687	-0.129155	-0.387466
Helicobacter	-0.299248	-0.354887	0.0556391	-0.362406	-0.270677	0.0932331	-0.431579
Enterorhabdus	0.690226	0.497744	0.64812	0.685714	0.679699	0.616541	0.687218
Candidatus_Saccharimonas	0.630312	0.429485	0.546822	0.743889	0.703272	0.494171	0.652877
Blautia	-0.456326	-0.358434	-0.0662651	-0.215362	-0.200301	-0.158133	-0.33735
Akkermansia	-0.659888	-0.719399	-0.40904	-0.520528	-0.579285	-0.450472	-0.645576
Mucispirillum	-0.500188	-0.353516	-0.347499	-0.415194	-0.411433	-0.495675	-0.45205
Intestinimonas	0.121805	0.2	-0.401504	-0.0827068	-0.12782	-0.449624	0.0977444
Parasutterella	-0.515983	-0.728845	-0.259496	-0.516736	-0.594208	-0.209853	-0.58443
Bilophila	-0.721867	-0.78058	-0.511103	-0.574332	-0.639067	-0.62326	-0.741438
Muribaculum	-0.333835	-0.112782	-0.377444	-0.251128	-0.326316	-0.300752	-0.300752
Butyricicoccus	0.0120391	0.0308503	0.265613	0.155756	0.167043	0.207675	0.0579383
unidentified_Clostridiales	-0.381312	-0.407688	-0.312736	-0.357198	-0.380559	-0.361719	-0.354183

## Sheet: 关联图中r>0.6
Data1	Data2	rho	pvalue	relation
Akkermansia	Serum.LDL.c	0.608479	0.00124925	positive
Alistipes	Serum.LDL.c	-0.603846	0.00139236	negtive
Alistipes	Propionic.acid	0.639231	0.000581783	positive
Bilophila	Butyric.acid	-0.744276	1.99295e-05	negtive
Bilophila	Isovaleric.acid	-0.702328	9.08627e-05	negtive
Bilophila	SCFAs	-0.642294	0.000536723	negtive
Bilophila	Propionic.acid	-0.629979	0.000738386	negtive
Bilophila	Liver.TC	0.690398	0.000133635	positive
Candidatus_Saccharimonas	SCFAs	0.63166	0.000707487	positive
Candidatus_Saccharimonas	Isovaleric.acid	0.690517	0.000133133	positive
Candidatus_Saccharimonas	Butyric.acid	0.757453	1.16462e-05	positive
Desulfovibrio	Liver.LDL.c	0.661538	0.000316869	positive
Enterorhabdus	Liver.TC	-0.627813	0.000779914	negtive
Enterorhabdus	Isovaleric.acid	0.735526	2.79824e-05	positive
Enterorhabdus	Butyric.acid	0.818234	5.82937e-07	positive
Erysipelatoclostridium	Acetic.acid	-0.619231	0.000964957	negtive
Erysipelatoclostridium	Serum.LDL.c	0.837692	1.75466e-07	positive
Lachnoclostridium	Acetic.acid	-0.794615	2.09775e-06	negtive
Lachnoclostridium	Isobutyric.acid	-0.758462	1.11619e-05	negtive
Lachnoclostridium	Bodyweight	-0.726923	3.85821e-05	negtive
Lachnoclostridium	Liver.HDL.c	-0.607692	0.00127262	negtive
Lachnoclostridium	Liver.LDL.c	0.619231	0.000964957	positive
Lachnoclostridium	Serum.TG	0.649231	0.00044571	positive
Lachnoclostridium	Serum.LDL.c	0.681538	0.000175955	positive
Lachnoclostridium	IL.6	0.741538	2.21934e-05	positive
Lactobacillus	Liver.TC	-0.683846	0.000163935	negtive
Lactobacillus	HOMA.ISI	0.61	0.00120511	positive
Lactobacillus	SCFAs	0.626923	0.000797554	positive
Lactobacillus	Liver.HDL.c	0.630769	0.000723717	positive
Lactobacillus	Butyric.acid	0.662308	0.000310026	positive
Lactobacillus	Valeric.acid	0.690769	0.000132078	positive
Lactobacillus	Isovaleric.acid	0.697692	0.000105786	positive
Oscillibacter	Valeric.acid	-0.738219	2.52425e-05	negtive
Oscillibacter	Isovaleric.acid	-0.737065	2.63862e-05	negtive
Oscillibacter	Butyric.acid	-0.684362	0.000161347	negtive
Oscillibacter	Liver.HDL.c	-0.620119	0.00094419	negtive
Oscillibacter	Liver.TC	0.655126	0.000379225	positive
Parabacteroides	Isovaleric.acid	-0.703597	8.71167e-05	negtive
Parabacteroides	Butyric.acid	-0.702827	8.93722e-05	negtive
Parabacteroides	SCFAs	-0.636276	0.00062832	negtive
Parasutterella	Butyric.acid	-0.674365	0.000218389	negtive
Parasutterella	Isovaleric.acid	-0.647421	0.000468051	negtive
Parasutterella	Propionic.acid	-0.615859	0.0010474	negtive
Roseburia	Butyric.acid	-0.866923	2.07938e-08	negtive
Roseburia	Isovaleric.acid	-0.749231	1.63464e-05	negtive
Roseburia	Propionic.acid	-0.672308	0.000232102	negtive
Roseburia	SCFAs	-0.666154	0.00027771	negtive
Roseburia	Liver.TC	0.754615	1.31111e-05	positive
unidentified_Clostridiales	Bodyweight	-0.698499	0.000103045	negtive
unidentified_Enterobacteriaceae	Propionic.acid	0.603077	0.00141744	positive
unidentified_Lachnospiraceae	Propionic.acid	-0.65	0.000436498	negtive
unidentified_Lachnospiraceae	IL.6	0.627692	0.000782287	positive
