# Supplementary material for: Fagopyrum tataricum ethanol extract ameliorates symptoms of hyperglycemia by regulating gut microbiota in type 2 diabetes mellitus mice
Source: Royal Society of Chemistry journal article supplement (doi:10.1039/d3fo02385k), 2023-01-01
Supplement: d3fo02385k2.pdf [file d3fo02385k2.pdf]

Table S1 The main compounds of FTE using UPLC-QTOF-MS/MS

| No. | ID         | Name                                    | mz          | RT(s)   | Exact mass | Formula   | KEGG   | Type                   | Library   | Identify pvalue | Superpathway         | Class                         |
|-----|------------|-----------------------------------------|-------------|---------|------------|-----------|--------|------------------------|-----------|-----------------|----------------------|-------------------------------|
| 1   | M257T455   | (2S)-Liquiritigenin                     | 257.1859716 | 455.313 | 256.0736   | C15H12O4  | C09762 | [M+H] <sup>+</sup>     | BioDeepDB | 0.004844582     | Lipid                | Flavonoids                    |
| 2   | M301T551   | Hesperetin                              | 301.2019364 | 550.779 | 302.079    | C16H14O6  | C01709 | [M-H] <sup>-</sup>     | BioDeepDB | 0.197456826     | Lipid                | Flavonoids                    |
| 3   | M287T761   | Luteolin                                | 287.1745333 | 761.397 | 286.0477   | C15H10O6  | C01514 | [M+H] <sup>+</sup>     | BioDeepDB | 0.079155907     | Lipid                | Flavonoids                    |
| 4   | M87T89     | (R)-3-Hydroxybutyric acid               | 87.0447555  | 89.1543 | 104.0473   | C4H8O3    | C01089 | [M+H-H2O] <sup>+</sup> | BioDeepDB | 2.10705E-06     | Carbohydrate         | Hydroxy acids and derivatives |
| 5   | M215T665   | 12-Hydroxydodecanoic acid               | 215.0128231 | 664.796 | 216.1725   | C12H24O3  | C08317 | [M-H] <sup>-</sup>     | BioDeepDB | 2.81988E-13     | Lipid                | Hydroxy acids and derivatives |
| 6   | M177T284   | Gulonic acid                            | 177.0392703 | 284.239 | 196.0583   | C6H12O7   | C00800 | [M-H2O-H] <sup>-</sup> | GNPS      | 0.000100522     | Carbohydrate         | Hydroxy acids and derivatives |
| 7   | M133T90    | Malate                                  | 133.0146619 | 89.8838 | 134.0215   | C4H6O5    | C00711 | [M-H] <sup>-</sup>     | mzCloud   | 0.000407619     | Unknow               | Hydroxy acids and derivatives |
| 8   | M174T123   | 1H-Indole-3-acetamide                   | 174.0771066 | 123.223 | 174.0793   | C10H10N2O | C02693 | [M] <sup>-</sup>       | BioDeepDB | 0.768254275     | Amino acid           | Indoles and derivatives       |
| 9   | M146T582   | 1H-Indole-3-carboxaldehyde              | 146.0607806 | 581.823 | 145.0528   | C9H7NO    | C08493 | [M+H] <sup>+</sup>     | MoNA      | 4.0806E-06      | Unknow               | Indoles and derivatives       |
| 10  | M157T47    | 3-Indoleacetoneitrile                   | 157.0858269 | 46.8638 | 156.0687   | C10H8N2   | C02938 | [M+H] <sup>+</sup>     | BioDeepDB | 8.02692E-16     | Amino acid           | Indoles and derivatives       |
| 11  | M192T395   | 5-Hydroxyindoleacetate                  | 192.0663177 | 394.863 | 191.0582   | C10H9NO3  | C05635 | [M+H] <sup>+</sup>     | mzCloud   | 5.17992E-05     | Amino acid           | Indoles and derivatives       |
| 12  | M191T792   | 5-Hydroxyindoleacetic acid              | 191.1079931 | 792.409 | 191.0582   | C10H9NO3  | C05635 | [M] <sup>-</sup>       | BioDeepDB | 1.43474E-09     | Amino acid           | Indoles and derivatives       |
| 13  | M204T458   | 5-Methoxyindoleacetate                  | 204.0669419 | 457.612 | 205.0739   | C11H11NO3 | C05660 | [M-H] <sup>-</sup>     | BioDeepDB | 4.9298E-06      | Amino acid           | Indoles and derivatives       |
| 14  | M248T478   | 6-Hydroxymelatonin                      | 248.1128988 | 478.2   | 248.1161   | C13H16N2O | C05643 | [M] <sup>+</sup>       | BioDeepDB | 5.94458E-08     | Amino acid           | Indoles and derivatives       |
| 15  | M169T461   | Beta-Carboline                          | 169.0761002 | 460.714 | 168.0687   | C11H8N2   | C20157 | [M+H] <sup>+</sup>     | MoNA      | 1.90078E-08     | ofactors and Vitamin | Indoles and derivatives       |
| 16  | M189T494   | Dimethyltryptamine                      | 189.1382226 | 493.628 | 188.1313   | C12H16N2  | C08302 | [M+H] <sup>+</sup>     | BioDeepDB | 0.144682319     | Unknow               | Indoles and derivatives       |
| 17  | M175T386   | Gramine                                 | 175.1228275 | 386.224 | 174.1157   | C11H14N2  | C08304 | [M+H] <sup>+</sup>     | MoNA      | 0.280568682     | Amino acid           | Indoles and derivatives       |
| 18  | M117T113   | Indole                                  | 117.0547885 | 112.901 | 117.0578   | C8H7N     | C00463 | [M] <sup>+</sup>       | BioDeepDB | 0.00261501      | Amino acid           | Indoles and derivatives       |
| 19  | M176T599   | Indole-3-acetate                        | 176.0703419 | 599.248 | 175.0633   | C10H9NO2  | C00954 | [M+H] <sup>+</sup>     | mzCloud   | 6.75114E-23     | Amino acid           | Indoles and derivatives       |
| 20  | M162T564   | Indole-3-carboxylic acid                | 162.054805  | 563.736 | 161.0477   | C9H7NO2   | C19837 | [M+H] <sup>+</sup>     | MoNA      | 7.85205E-11     | Amino acid           | Indoles and derivatives       |
| 21  | M203T362   | Indolebutyric acid                      | 203.0931876 | 362.07  | 203.0946   | C12H13NO2 | C11284 | [M] <sup>-</sup>       | mzCloud   | 0.248417782     | Unknow               | Indoles and derivatives       |
| 22  | M188T473   | Indolelactic acid                       | 188.0705759 | 472.689 | 205.0739   | C11H11NO3 | C02043 | [M+H-H2O] <sup>+</sup> | MoNA      | 0.144682311     | Amino acid           | Indoles and derivatives       |
| 23  | M191T435   | N-Methylserotonin                       | 191.1176524 | 435.143 | 190.1106   | C11H14N2O | C06212 | [M+H] <sup>+</sup>     | BioDeepDB | 5.78073E-06     | Amino acid           | Indoles and derivatives       |
| 24  | M249T527   | Pindolol                                | 249.1592902 | 526.803 | 248.1525   | C14H20N2O | C07445 | [M+H] <sup>+</sup>     | BioDeepDB | 1.87362E-06     | Unknow               | Indoles and derivatives       |
| 25  | M161T428   | Tryptamine                              | 161.1083364 | 427.728 | 160.1      | C10H12N2  | C00398 | [M+H] <sup>+</sup>     | BioDeepDB | 1.24815E-16     | Amino acid           | Indoles and derivatives       |
| 26  | M144T427_2 | Tryptophanol                            | 144.0798299 | 426.665 | 161.0841   | C10H11NO  | C00955 | [M+H-H2O] <sup>+</sup> | BioDeepDB | 0.000135609     | Amino acid           | Indoles and derivatives       |
| 27  | M283T689   | Biochanin A                             | 283.0605701 | 688.739 | 284.0685   | C16H12O5  | C00814 | [M-H] <sup>-</sup>     | BioDeepDB | 1.10818E-10     | Lipid                | Isoflavonoids                 |
| 28  | M267T734   | Formononetin                            | 267.0680944 | 734.417 | 268.0736   | C16H12O4  | C00858 | [M-H] <sup>-</sup>     | BioDeepDB | 8.23517E-13     | Lipid                | Isoflavonoids                 |
| 29  | M271T655   | Genistein                               | 271.1795415 | 655.327 | 270.0528   | C15H10O5  | C06563 | [M+H] <sup>+</sup>     | BioDeepDB | 3.91102E-08     | Lipid                | Isoflavonoids                 |
| 30  | M337T116_2 | Psoralidin                              | 337.1120992 | 115.989 | 336.0998   | C20H16O5  | C10523 | [M+H] <sup>+</sup>     | mzCloud   | 8.73379E-05     | Lipid                | Isoflavonoids                 |
| 31  | M165T515_1 | 3-Methoxy-4-hydroxyphenylglycolaldehyde | 165.0537304 | 515.424 | 182.0579   | C9H10O4   | C05583 | [M+H-H2O] <sup>+</sup> | MetaDNA   | 0.003330742     | Amino acid           | Phenols                       |
| 32  | M167T358   | 3,4-Dihydroxyphenylacetate              | 167.0351799 | 358.172 | 168.0423   | C8H8O4    | C01161 | [M-H] <sup>-</sup>     | mzCloud   | 0.01108441      | Amino acid           | Phenols                       |
| 33  | M137T646   | 4-Hydroxyphenylethanol                  | 137.0609223 | 646.492 | 138.0681   | C8H10O2   | C06044 | [M-H] <sup>-</sup>     | mzCloud   | 0.000271927     | Amino acid           | Phenols                       |
| 34  | M125T468   | 4-Methylcatechol                        | 125.0603275 | 468.229 | 124.0524   | C7H8O2    | C06730 | [M+H] <sup>+</sup>     | BioDeepDB | 3.92574E-07     | Xenobiotics          | Phenols                       |
| 35  | M302T449   | Dobutamine                              | 302.1727473 | 448.965 | 301.1678   | C18H23NO3 | C06967 | [M+H] <sup>+</sup>     | mzCloud   | 2.64925E-05     | Unknow               | Phenols                       |
| 36  | M154T164   | Dopamine                                | 154.0864564 | 164.467 | 153.079    | C8H11NO2  | C03758 | [M+H] <sup>+</sup>     | BioDeepDB | 3.03341E-05     | Amino acid           | Phenols                       |
| 37  | M166T317   | Epinephrine                             | 166.0862558 | 317.016 | 183.0895   | C9H13NO3  | C00788 | [M+H-H2O] <sup>+</sup> | MoNA      | 3.98495E-05     | Amino acid           | Phenols                       |
| 38  | M183T39    | Homovanillic acid                       | 183.0647637 | 39.0339 | 182.0579   | C9H10O4   | C05582 | [M+H] <sup>+</sup>     | BioDeepDB | 0.001805929     | Amino acid           | Phenols                       |
| 39  | M111T301_1 | Hydroquinone                            | 111.0439957 | 301.352 | 110.0368   | C6H6O2    | C00530 | [M+H] <sup>+</sup>     | MoNA      | 2.37762E-10     | Xenobiotics          | Phenols                       |
| 40  | M240T567   | Isoetharine                             | 240.1587777 | 567.165 | 239.1521   | C13H21NO3 | C07053 | [M+H] <sup>+</sup>     | BioDeepDB | 0.050040993     | Unknow               | Phenols                       |
| 41  | M109T701   | m-Cresol                                | 109.1006382 | 700.813 | 108.0575   | C7H8O     | C01467 | [M+H] <sup>+</sup>     | BioDeepDB | 8.23957E-05     | Xenobiotics          | Phenols                       |
| 42  | M152T141   | Norepinephrine                          | 152.0693286 | 140.706 | 169.0739   | C8H11NO3  | C00547 | [M+H-H2O] <sup>+</sup> | BioDeepDB | 4.20074E-06     | Amino acid           | Phenols                       |

|    |            |               |             |         |          |           |        |                        |           |             |             |         |
|----|------------|---------------|-------------|---------|----------|-----------|--------|------------------------|-----------|-------------|-------------|---------|
| 43 | M212T556   | Orciprenaline | 212.1280464 | 555.576 | 211.1208 | C11H17NO3 | C07144 | [M+H] <sup>+</sup>     | BioDeepDB | 9.02016E-09 | Unknow      | Phenols |
| 44 | M150T383_2 | p-Synephrine  | 150.0913223 | 382.911 | 167.0946 | C9H13NO2  | C04548 | [M+H-H2O] <sup>+</sup> | MoNA      | 1.49639E-05 | Unknow      | Phenols |
| 45 | M168T299   | Phenylephrine | 168.1017093 | 299.097 | 167.0946 | C9H13NO2  | C07441 | [M+H] <sup>+</sup>     | BioDeepDB | 4.96035E-08 | Xenobiotics | Phenols |
| 46 | M136T449_2 | Salicylamide  | 136.0410642 | 449.384 | 137.048  | C7H7NO2   | NULL   | [M-H] <sup>-</sup>     | BioDeepDB | 1.86242E-11 | Unknow      | Phenols |
| 47 | M121T437   | Tyrosol       | 121.06564   | 437.161 | 138.0681 | C8H10O2   | C06044 | [M+H-H2O] <sup>+</sup> | BioDeepDB | 4.54132E-08 | Amino acid  | Phenols |
